# Supplementary material for: An air chargeable hydrogen battery by reversible electrochemical trapping of the protons
Source: Royal Society of Chemistry journal article supplement (doi:10.1039/d2gc02927h), 2022-01-01
Supplement: d2gc02927h2.pdf [file d2gc02927h2.pdf]

## Supporting information

An Air Chargeable Hydrogen Battery by Reversible Electrochemical Trapping of the Protons

Neethu Christudas Dargily<sup>†</sup>, Ravikumar Thimmappa<sup>†</sup>, Mruthunjayachari Chattanahalli Devendrachari, and Musthafa Ottakam Thotiyl\*

Department of Chemistry and Centre for Energy Science, Indian Institute of Science Education and Research (IISER)-Pune, Dr. Homi Bhabha Road, Pashan, Pune, 411008, India.

Corresponding Author: Musthafa Ottakam Thotiyl

E-mail: [musthafa@iiserpune.ac.in](mailto:musthafa@iiserpune.ac.in)

## Table of Contents

|                                                                     |                                                                                                                                                                                                                                                                                                                      |     |
|---------------------------------------------------------------------|----------------------------------------------------------------------------------------------------------------------------------------------------------------------------------------------------------------------------------------------------------------------------------------------------------------------|-----|
| Results and discussion/ supplementary figures, tables, calculations |                                                                                                                                                                                                                                                                                                                      | 3-8 |
| Figure S1                                                           | (a) Single electrode potentials of BQ and QH <sub>2</sub> electrodes with respect to H <sub>2</sub> /H <sup>+</sup> and O <sub>2</sub> /H <sub>2</sub> O half-cell reactions. Schematic representation of reactions occurring at the (b) H <sub>2</sub> -BQ battery and (c) QH <sub>2</sub> -O <sub>2</sub> battery. | 3   |
| Figure S2                                                           | (a) Cyclic voltammogram of benzoquinone (BQ) in 0.5 M H <sub>2</sub> SO <sub>4</sub> on a glassy carbon electrode at different scan rates. (b) pH vs. potential (Pourbiax diagram) of 5 mM benzoquinone at different pH.                                                                                             | 3   |
| Figure S3                                                           | (a) RDE of QH <sub>2</sub> oxidation. (b) Koutecky-Levich plots for QH <sub>2</sub> oxidation. (c) Number of electrons (n) involved during QH <sub>2</sub> oxidation. (d) Overpotential vs. log i <sub>k</sub> for QH <sub>2</sub> oxidation.                                                                        | 4   |
| Table S1                                                            | Electrochemical parameters extracted from RRDE and Koutecky-Levich plots                                                                                                                                                                                                                                             | 4   |
| Figure S4                                                           | In-situ UV-Vis spectroelectrochemistry data for the redox reaction of benzoquinone. (a) Chronoamperometry. (b) the potential dependent spectra acquired during the oxidation scan and (c) during the reduction scan.                                                                                                 | 5   |
| Figure S5                                                           | Figure S5: UV-Vis spectra (a) H <sub>2</sub> -BQ battery cathode and (b) QH <sub>2</sub> -O <sub>2</sub> battery anode during different discharge cycles.                                                                                                                                                            | 6   |
| Table S1                                                            | Battery discharge capacity                                                                                                                                                                                                                                                                                           | 7   |
| Table S2                                                            | Calculation of cumulative capacity                                                                                                                                                                                                                                                                                   | 7   |
| Calculation S1                                                      |                                                                                                                                                                                                                                                                                                                      | 8   |
| Calculation S2                                                      |                                                                                                                                                                                                                                                                                                                      | 8   |

## Results and discussion:

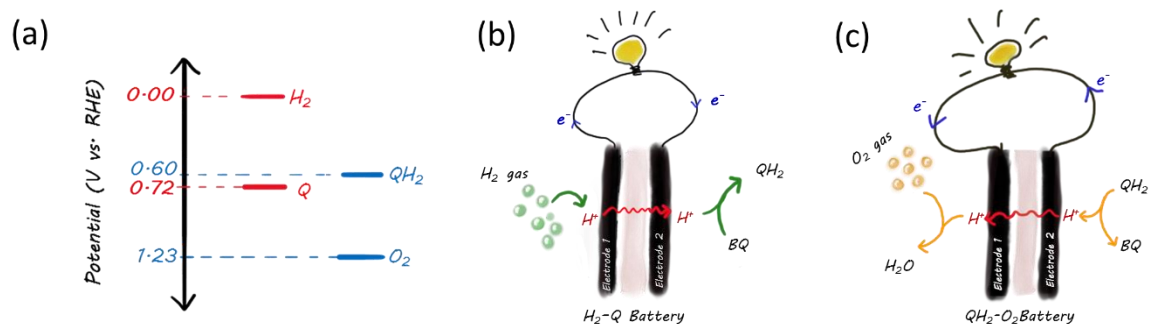

Figure S1: (a) Single electrode potentials of BQ and QH<sub>2</sub> electrodes with respect to H<sub>2</sub>/H<sup>+</sup> and O<sub>2</sub>/H<sub>2</sub>O half-cell reactions. Schematic representation of reactions occurring at the (b) H<sub>2</sub>-BQ battery and (c) QH<sub>2</sub>-O<sub>2</sub> battery.

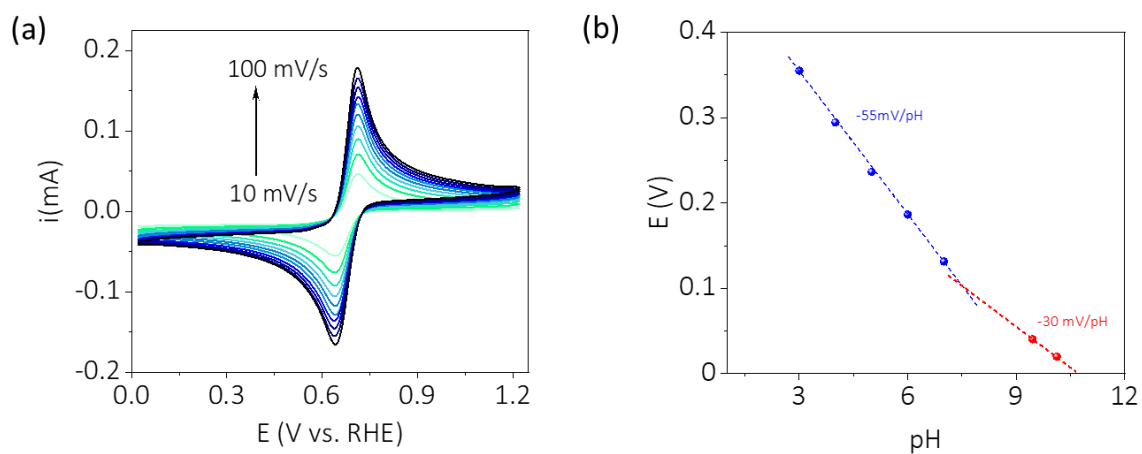

Figure S2: (a) Cyclic voltammogram of benzoquinone (BQ) in 0.5 M H<sub>2</sub>SO<sub>4</sub> on a glassy carbon electrode at different scan rates. (b) pH vs. potential (Pourbaix diagram) of 5 mM benzoquinone at different pH.

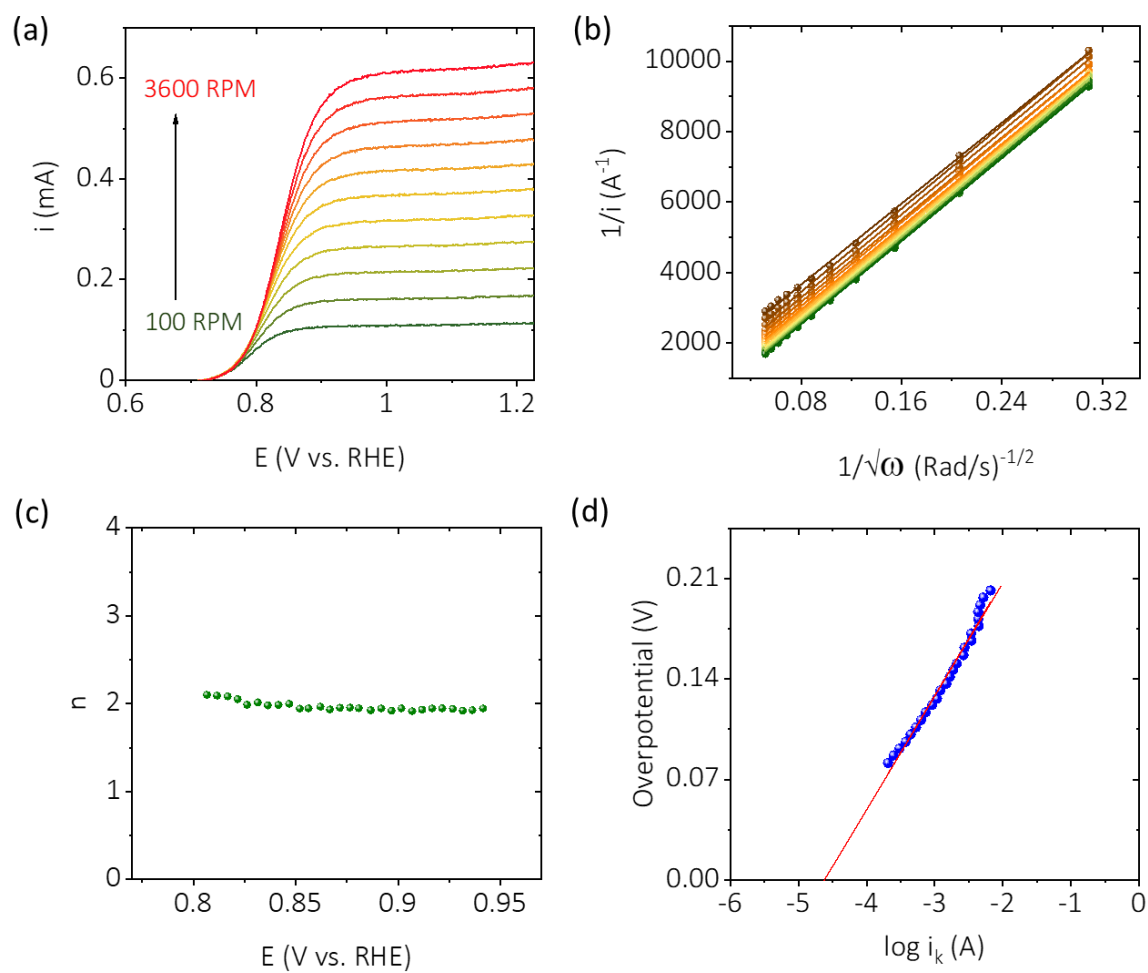

Figure S3: (a) RDE of QH<sub>2</sub> oxidation. (b) Koutecky-Levich plots for QH<sub>2</sub> oxidation. (c) Number of electrons ( $n$ ) involved during QH<sub>2</sub> oxidation. (d) Overpotential vs.  $\log i_k$  for QH<sub>2</sub> oxidation.

Table S1: Electrochemical parameters extracted from RRDE and Koutecky-Levich plot.

| Species                   | No: of electrons | $\beta$ | Rate constant (cm/s) |
|---------------------------|------------------|---------|----------------------|
| Benzoquinone/Hydroquinone | 2.03             | 0.42    | $1.3 \cdot 10^{-4}$  |

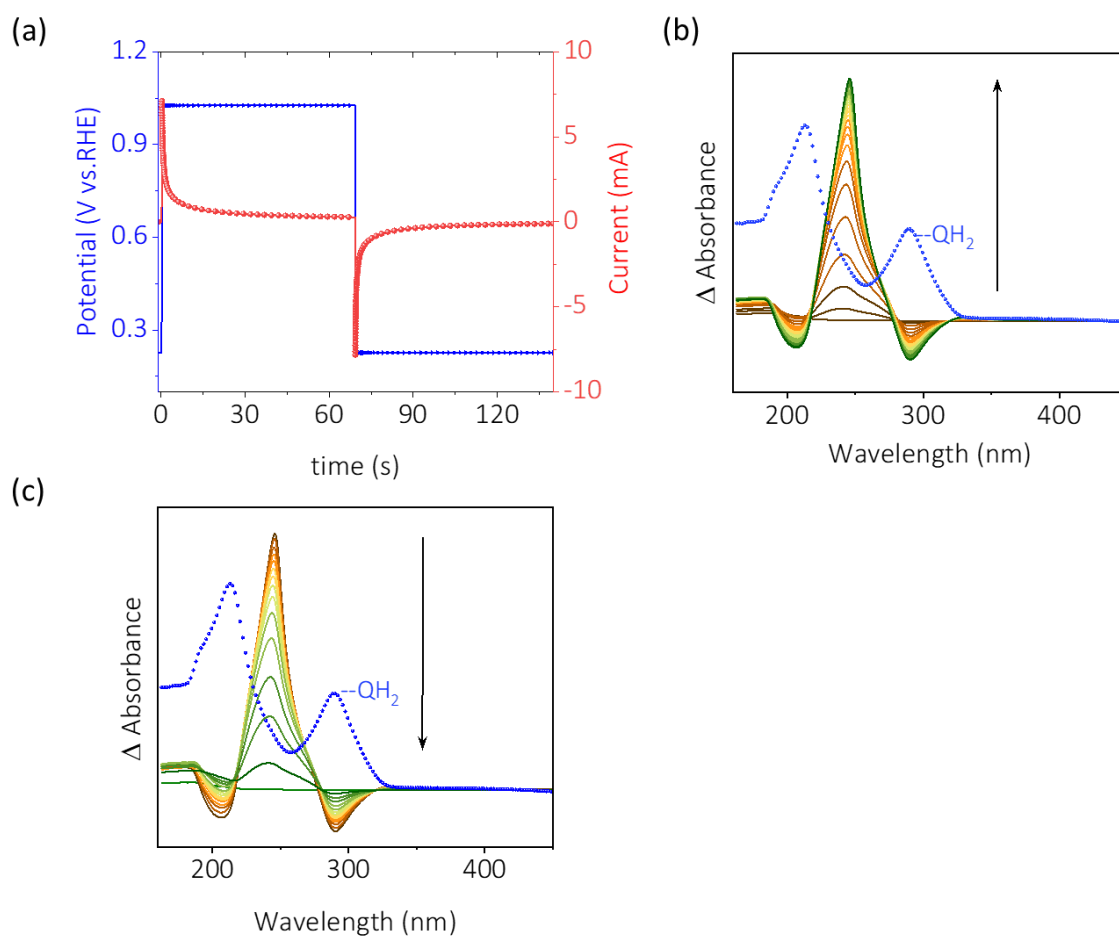

Figure S4: In-situ UV-Vis spectroelectrochemistry data for the redox reaction of benzoquinone. (a) Chronoamperometry, (b) the potential dependent spectra acquired during the oxidation scan and (c) during the reduction scan.

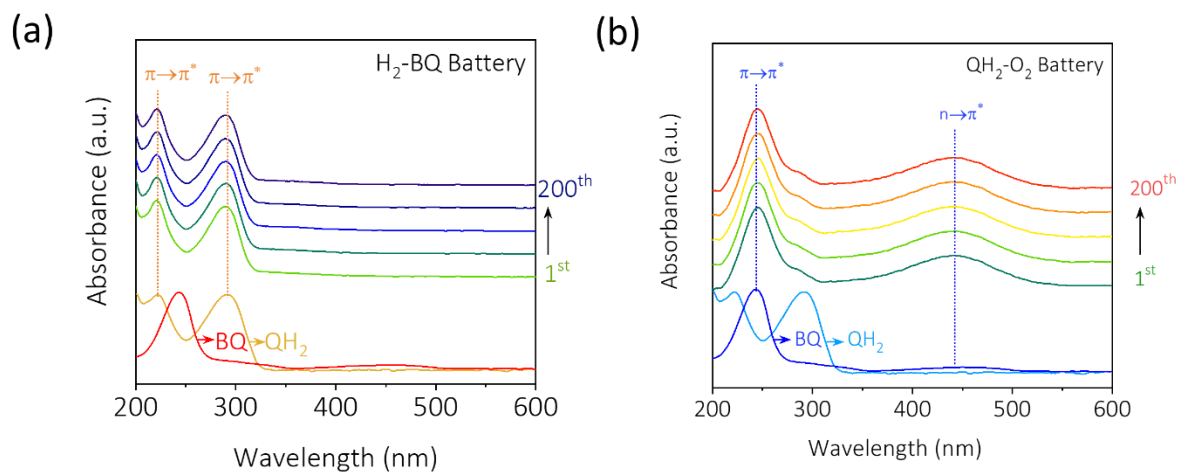

Figure S5: UV-Vis spectra (a) H<sub>2</sub>-Q battery cathode and (b) QH<sub>2</sub>-O<sub>2</sub> battery anode during different discharge cycles.

Table S2: Battery discharge capacity

|                         | Discharge capacity in mAh/g |                                         |
|-------------------------|-----------------------------|-----------------------------------------|
|                         | H <sub>2</sub> -BQ Battery  | QH <sub>2</sub> -O <sub>2</sub> Battery |
| 1 <sup>st</sup> cycle   | 364.69                      | 364.54                                  |
| 10 <sup>th</sup> cycle  | 364.14                      | 362.97                                  |
| 50 <sup>th</sup> cycle  | 355.13                      | 353.70                                  |
| 100 <sup>th</sup> cycle | 343.24                      | 342.00                                  |
| 200 <sup>th</sup> cycle | 330.44                      | 329.41                                  |

Table S3: Calculation of cumulative capacity

|                                             | Cumulative discharge capacity (mAh/g) |                                         |
|---------------------------------------------|---------------------------------------|-----------------------------------------|
|                                             | H <sub>2</sub> -BQ Battery            | QH <sub>2</sub> -O <sub>2</sub> Battery |
| 1 <sup>st</sup> – 10 <sup>th</sup> cycle    | 3644.15                               | 3637.55                                 |
| 11 <sup>th</sup> – 50 <sup>th</sup> cycle   | 14385.44                              | 14333.40                                |
| 51 <sup>th</sup> -100 <sup>th</sup> cycle   | 17459.17                              | 17392.55                                |
| 101 <sup>th</sup> – 200 <sup>th</sup> cycle | 33684.15                              | 33570.00                                |
| Total                                       | 69172.91                              | 68933.50                                |

**Calculation S1:**

Amount(g) of BQ used in 100 ml of 0.1 M solution :  $\frac{108.1 \times 0.1 \times 100}{1000} = 1.081 \text{ g}$

No: of moles of BQ :  $\frac{1.081}{108.1} = 0.01 \text{ moles}$

Electric charge :  $0.01 \times 2 = 0.02 \text{ F}$

Amount of hydrogen required : 0.01 moles

Amount of oxygen required : 0.005 moles

**Calculation S2:**

First discharge capacity of H<sub>2</sub>-BQ battery: 364.69 mAh/g

Cumulative capacity of H<sub>2</sub>-BQ battery after 200 cycles: 69172.91 mAh/g

Cumulative capacity of QH<sub>2</sub>-O<sub>2</sub> battery after 200 cycles: 68933.5 mAh/g

Cumulative capacity of the battery in total: 138106.41 mAh/g

Amount (g) of BQ required to achieve a capacity of 69172.91 mAh (Table S3) in primary battery configuration:  $69172.91 / 364.69 = 189.67 \text{ g}$

Similarly, amount (g) of QH<sub>2</sub> required to achieve a capacity of 68933.5 mAh (Table S3) in primary battery configuration:  $68933.50 / 364.54 = 189.09 \text{ g}$

Therefore, cumulative capacity during discharge and air charge processes = 378.76 g
